# Supplementary material for: Wildfire overrides hydrological controls on boreal peatland methane emissions
Source: Copernicus journal article supplement (doi:10.5194/bg-16-2651-2019), 2019-07-09
Supplement: Supplementary file 1 [file bg-16-2651-2019-supplement.pdf]

Supplement of Biogeosciences, 16, 2651–2660, 2019  
<https://doi.org/10.5194/bg-16-2651-2019-supplement>  
© Author(s) 2019. This work is distributed under  
the Creative Commons Attribution 4.0 License.

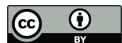

*Supplement of*

## **Wildfire overrides hydrological controls on boreal peatland methane emissions**

**Scott J. Davidson et al.**

*Correspondence to:* Scott J. Davidson ([s7davidson@uwaterloo.ca](mailto:s7davidson@uwaterloo.ca))

The copyright of individual parts of the supplement might differ from the CC BY 4.0 License.

1 **Supplementary information**

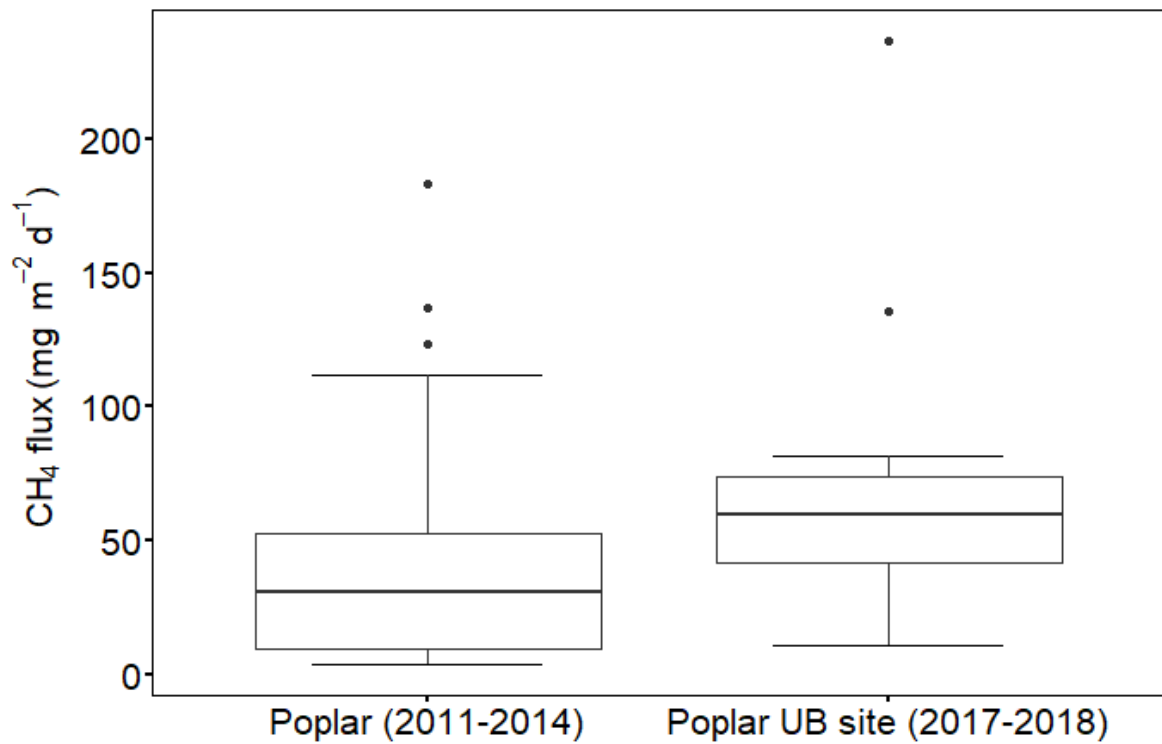

2

3 **Figure S1. Comparison of CH<sub>4</sub> emissions between a study conducted at Poplar Fen (2011-2014;**  
4 **Murray *et al.*, 2017) and this study (UB site only).**

5

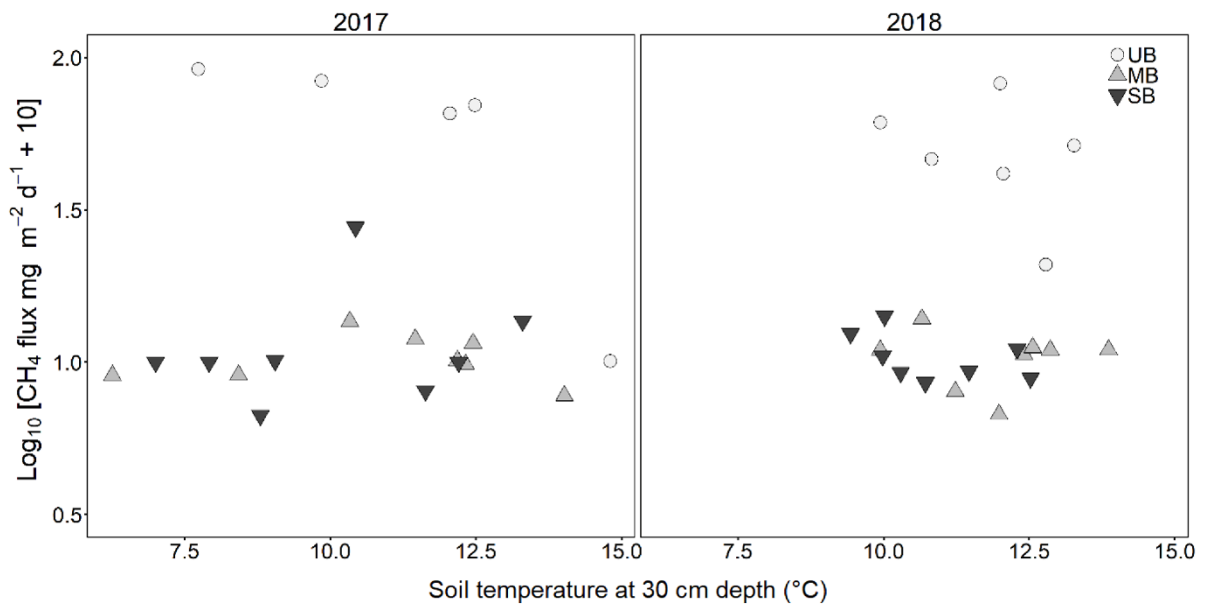

6

7 **Figure S2. Seasonal mean CH<sub>4</sub> flux (log transformed) at each collar across the peat burn**  
8 **severity gradient plotted against seasonal mean ST at 30 cm depth. UB is unburned, MB is**  
9 **moderately burned and SB is severely burned. Note that CH<sub>4</sub> values were log transformed + 10**  
10 **therefore a value of 1 represents the measured value zero.**

11

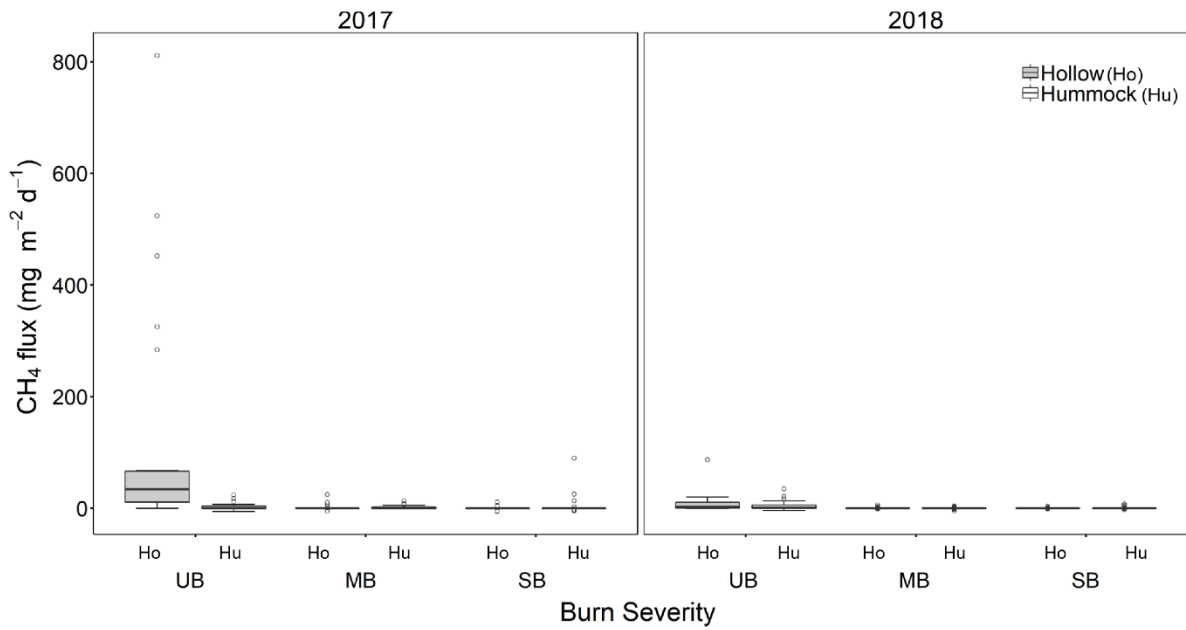

12

13 **Figure S3. Methane (CH<sub>4</sub>) emissions at each microform type across the peat burn severity**  
 14 **gradient for 2017 and 2018. UB is unburned, MB is moderately burned and SB is severely**  
 15 **burned.**

16

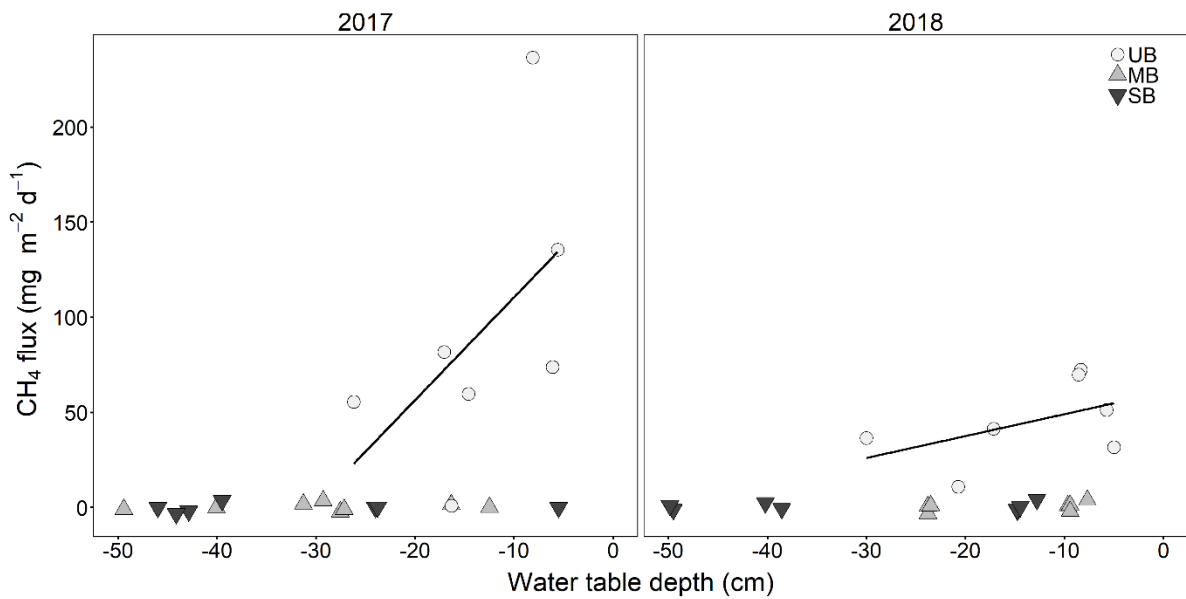

17

18 **Figure S4. Seasonal mean methane (CH<sub>4</sub>) flux at each collar across the peat burn severity**  
 19 **gradient plotted against seasonal mean water table (WT) depth. UB is unburned, MB is**  
 20 **moderately burned and SB is severely burned.**

21

**Table S1. Mean (standard deviation) gravimetric water content (%) and organic matter content by LOI (%) for each microform type across the peat burn severity gradient**

| Burn severity | Microform | Gravimetric water content (%) | Organic matter content (%) |
|---------------|-----------|-------------------------------|----------------------------|
| UB            | Hollow    | 84.8 (10.3)                   | 89.3 (3.3)                 |
|               | Hummock   | 83.5 (12.1)                   | 89.0 (2.3)                 |
| MB            | Hollow    | 77.5 (3.9)                    | 82.2 (1.9)                 |
|               | Hummock   | 83.2 (8.0)                    | 90.9 (2.7)                 |
| SB            | Hollow    | 88.4 (2.5)                    | 87.7 (2.8)                 |
|               | Hummock   | 89.6 (2.4)                    | 92.2 (2.9)                 |
